# Supplementary material for: A ratiometric fluorescent probe for imaging hydroxyl radicals in living cells
Source: Royal Society of Chemistry journal article supplement (doi:10.1039/b314204c), 2004-01-01
Supplement: b314204c.doc [file b314204c.doc]

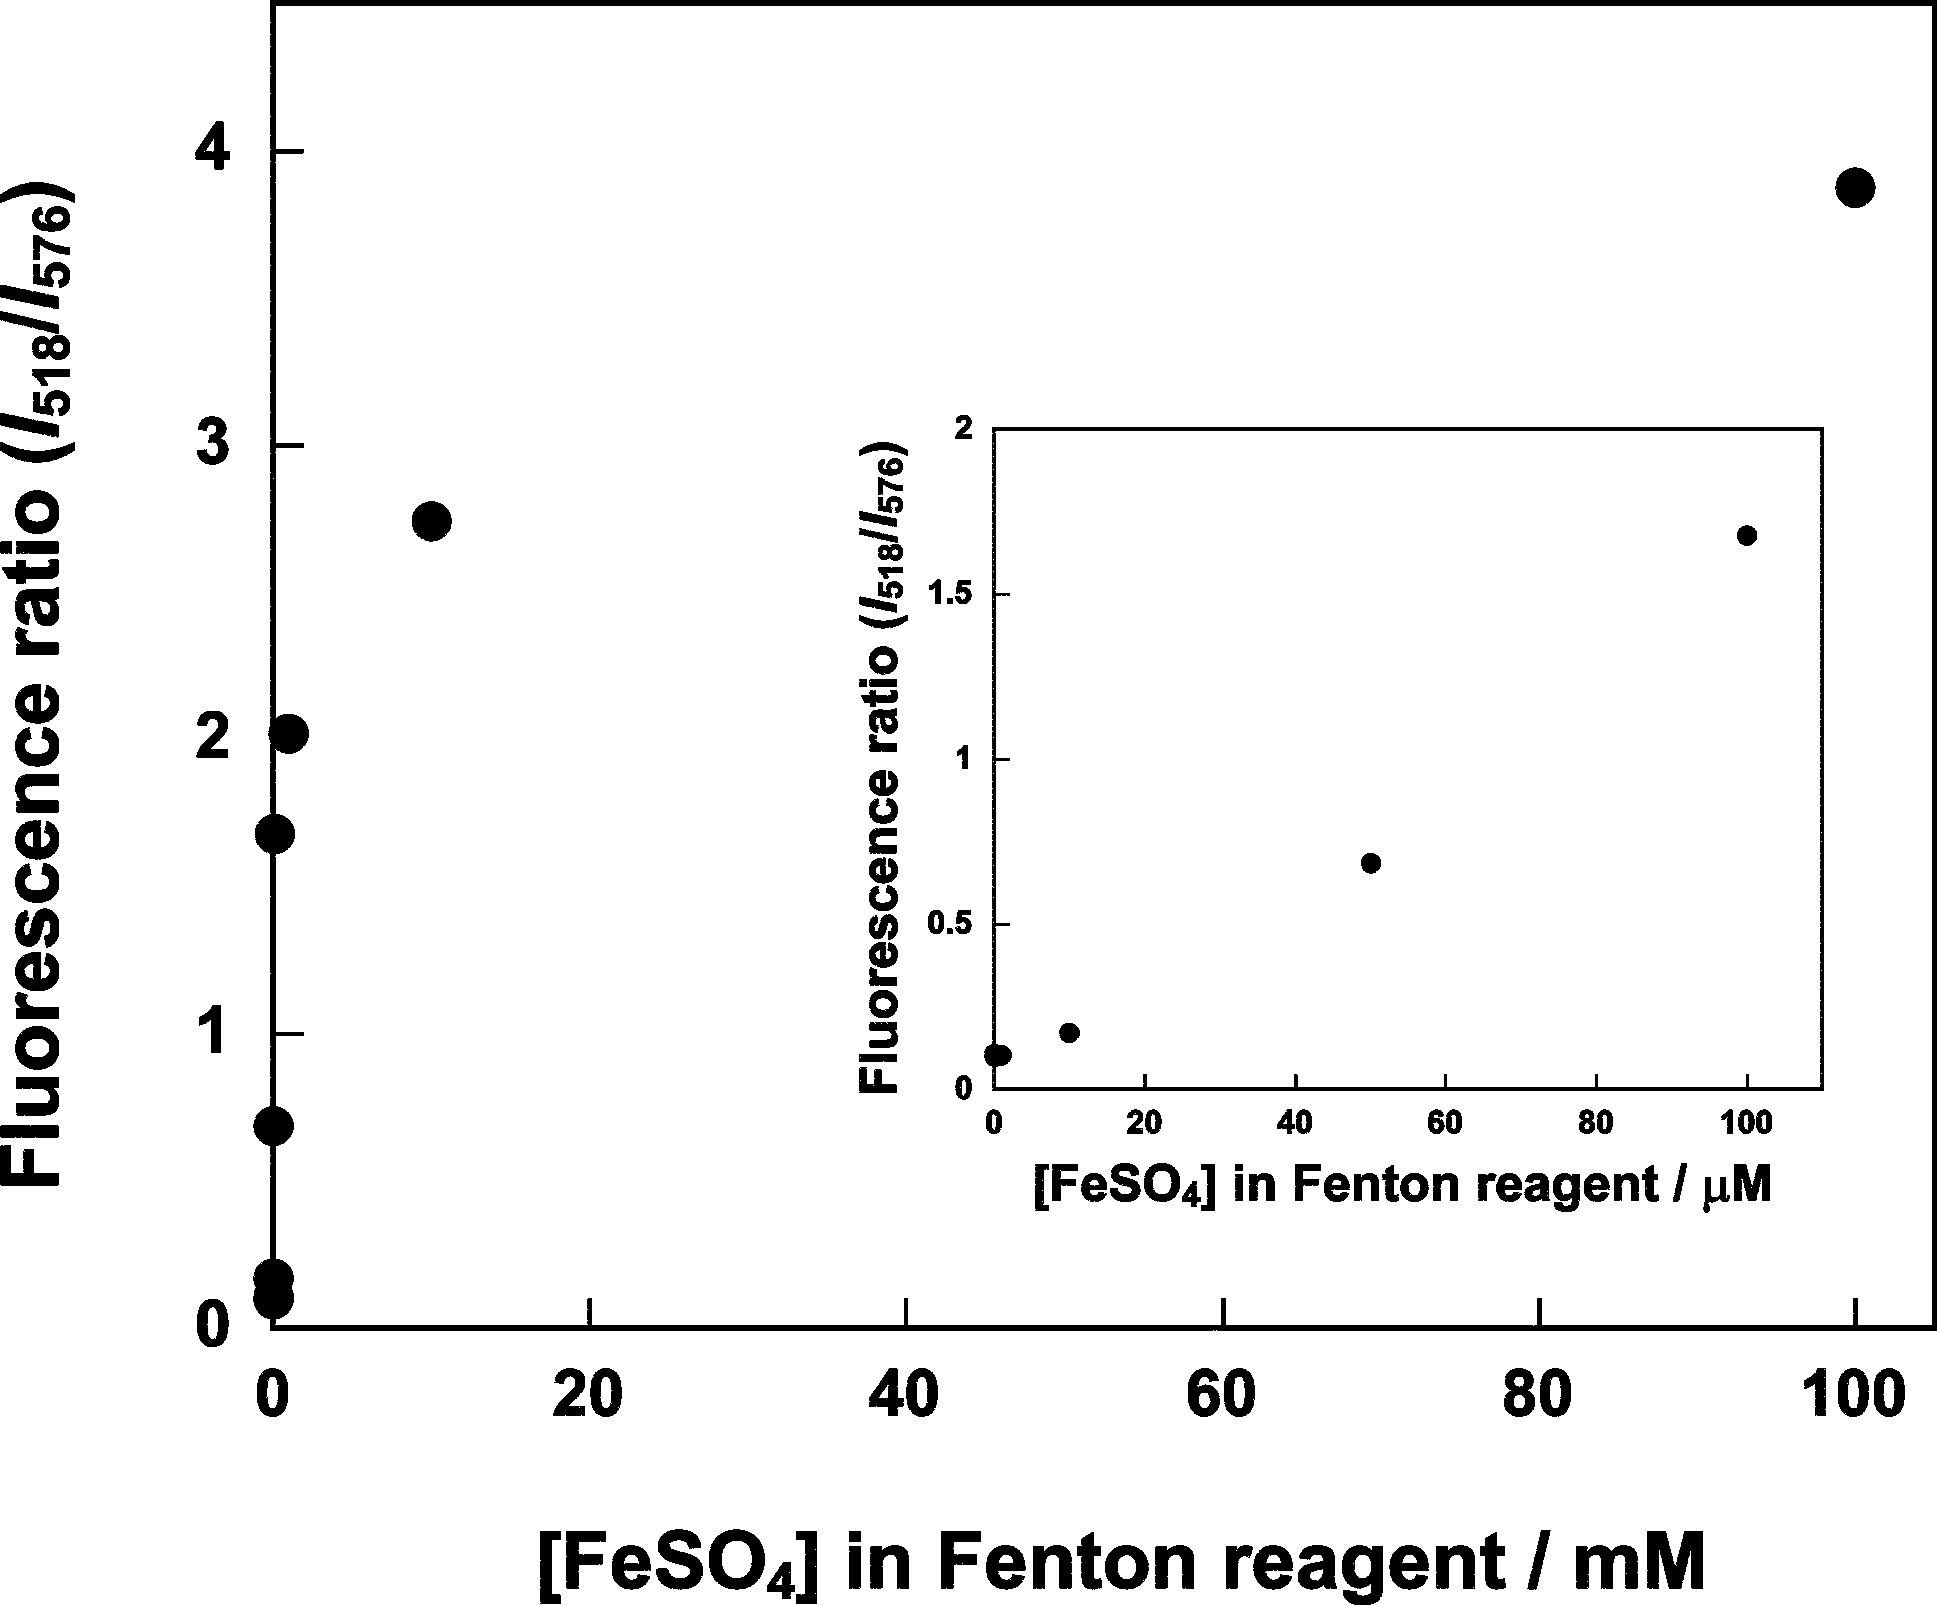


# Fig. 2 Relation between the concentration of Fenton’s reagent and fluorescence intensity ratio at 518 nm to 576 nm for probe 1. The molar ratio of FeSO4 to H2O2 is 1:10.
